# Supplementary material
Source: publisher figshare collection journal article supplement (https://diabetesjournals.figshare.com/ndownloader/files/24436418)
Supplement: Supplementary file 1 [file 24436418]

## **Appendix**

|                                                                                                                                                                                 |   |
|---------------------------------------------------------------------------------------------------------------------------------------------------------------------------------|---|
| <b>Appendix 1.</b> Composition of sample of people with diabetes mellitus according to diagnostic criteria .....                                                                | 2 |
| <b>Appendix 2.</b> Fourteen day outcomes among 168 hospitalized patients with diabetes mellitus and COVID-19, according to baseline glycemic control.....                       | 3 |
| <b>Appendix 3.</b> Multivariable logistic regression analysis of 14-day outcomes among 168 hospitalized people with COVID-19, with inclusion of baseline glycemic control. .... | 4 |
| <b>Appendix 4.</b> Univariate logistic regression analysis of 14-day outcomes among 450 hospitalized people with COVID-19.....                                                  | 5 |
| <b>Appendix 5.</b> Sensitivity analyses of 14-day outcomes among 450 people hospitalized with COVID-19.....                                                                     | 6 |
| <b>Appendix 6.</b> Additional BMI sub-categorization for 450 hospitalized people with COVID-19, according to diabetes status. ....                                              | 7 |
| <b>Appendix 7.</b> Multivariable logistic regression analysis of 14-day outcomes among 450 hospitalized people with COVID-19 (additional BMI category). ....                    | 7 |
| <b>Appendix 8.</b> Table of missing variables.....                                                                                                                              | 8 |

**Appendix 1.** Composition of sample of people with diabetes mellitus according to diagnostic criteria

| Diagnostic criteria                         | Number of cases included |
|---------------------------------------------|--------------------------|
| HbA1c only                                  | 11                       |
| Chart review only                           | 57                       |
| HbA1c and chart review                      | 110                      |
| Random blood glucose $\geq 200\text{mg/dL}$ | 2*                       |
| <b>Total</b>                                | <b>180<sup>†</sup></b>   |

\*Four individuals had a presenting random glucose  $\geq 200\text{mg/dL}$  with no recent HbA1c or chart review diagnosis of diabetes. Two endocrinologists adjudicated these cases and determined that two of the four did in fact have diabetes. <sup>†</sup>Two individuals in the sample had type 1 diabetes.

**Appendix 2.** Fourteen day outcomes among 168 hospitalized patients with diabetes mellitus and COVID-19, according to baseline glycemic control.

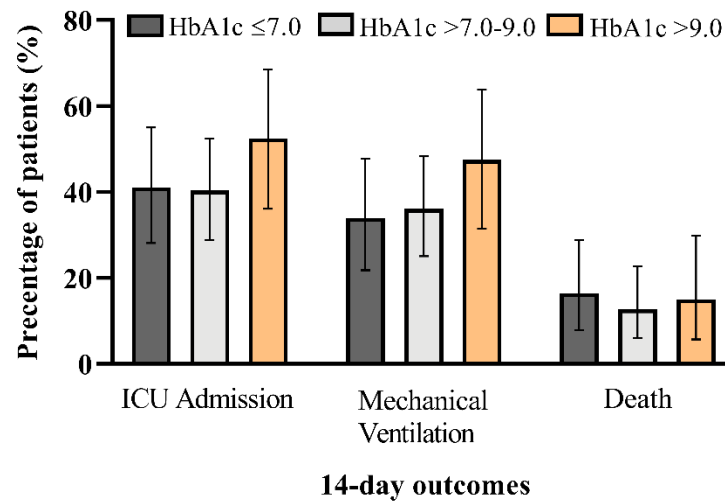

|                        | HbA1c ≤7.0% |           | HbA1c >7.0-9.0% |           | HbA1c >9.0% |           |
|------------------------|-------------|-----------|-----------------|-----------|-------------|-----------|
|                        | n (%)       | 95% CI    | n (%)           | 95% CI    | n (%)       | 95% CI    |
| ICU Admission          | 23 (41.1)   | 28.1-55.0 | 29 (40.3)       | 28.9-52.5 | 21 (52.5)   | 36.1-68.5 |
| Mechanical Ventilation | 19 (33.9)   | 21.8-47.8 | 26 (36.1)       | 25.1-48.3 | 19 (47.5)   | 31.5-63.9 |
| Death                  | 9 (16.4)    | 7.8-28.8  | 9 (12.7)        | 6.0-22.7  | 6 (15.0)    | 5.7-29.8  |

Fourteen day outcomes among 168 hospitalized patients with diabetes mellitus and COVID-19, according to baseline glycemic control. Three outcomes are shown on the X axis, the percentage of patients in each outcome group on the Y axis, with patients with baseline HbA1c ≤7% in dark grey, HbA1c >7.0-9.0% in light grey, and >9.0% in orange. Within each outcome, all pairwise chi-square tests were not statistically significant.

**Appendix 3.** Multivariable logistic regression analysis of 14-day outcomes among 168 hospitalized people with COVID-19, with inclusion of baseline glycemic control.

|                  | 14-day outcomes   |                        |                   |
|------------------|-------------------|------------------------|-------------------|
|                  | ICU Admission     | Mechanical Ventilation | Death             |
| <i>N</i>         | 168               | 166                    | 158               |
| Characteristic   | OR (95% CI)       | OR (95% CI)            | OR (95% CI)       |
| HbA1c >7.0-9.0   | 1.03 (0.48-2.25)  | 1.11 (0.49-2.49)       | 0.64 (0.22-1.84)  |
| HbA1c >9.0       | 1.33 (0.54-3.30)  | 1.34 (0.53-3.42)       | 1.33 (0.39-4.58)  |
| BMI Category     |                   |                        |                   |
| Overweight       | 1.26 (0.46-3.46)  | 1.41 (0.49-4.06)       | 0.88 (0.22-3.55)  |
| Obese            | 1.43 (0.55-3.73)  | 1.51 (0.55-4.10)       | 1.61 (0.45-5.69)  |
| Age              |                   |                        |                   |
| 50-59            | 0.73 (0.23-2.33)  | 0.51 (0.16-1.70)       | 2.06 (0.21-20.70) |
| 60-69            | 0.76 (0.23-2.48)  | 0.57 (0.17-1.90)       | 2.69 (0.26-27.54) |
| ≥70              | 0.60 (0.19-1.96)  | 0.54 (0.16-1.80)       | 6.04 (0.64-57.22) |
| Male             | 1.67 (0.83-3.35)  | 2.14 (1.02-4.48)       | 0.76 (0.29-1.94)  |
| Race/ethnicity   |                   |                        |                   |
| Hispanic         | 2.09 (0.92-4.77)  | 2.64 (1.13-6.17)       | 0.60 (0.17-2.10)  |
| African American | 1.43 (0.49-4.17)  | 1.59 (0.52-4.85)       | 0.71 (0.14-3.71)  |
| Other            | 3.04 (0.50-18.4)  | 2.35 (0.34-15.98)      | —                 |
| Unknown/missing  | 3.95 (1.34-11.67) | 4.57 (1.54-13.59)      | 0.49 (0.10-2.48)  |

Reference groups: HbA1c ≤7.0, normal weight for BMI category, age <50 years, female sex, Non-Hispanic White.

**Appendix 4.** Univariate logistic regression analysis of 14-day outcomes among 450 hospitalized people with COVID-19.

| Characteristic   | 14-day outcomes  |                        |                    |
|------------------|------------------|------------------------|--------------------|
|                  | ICU Admission    | Mechanical Ventilation | Death              |
|                  | OR (95% CI)      | OR (95% CI)            | OR (95% CI)        |
| Diabetes         | 1.70 (1.14-2.52) | 1.94 (1.28-2.93)       | 2.20 (1.20-4.01)   |
| BMI Group        |                  |                        |                    |
| Overweight       | 1.60 (0.91-2.82) | 1.67 (0.91-3.08)       | 0.40 (0.18-0.90)   |
| Obese            | 2.42 (1.41-4.26) | 2.39 (1.34-4.27)       | 0.64 (0.32-1.28)   |
| Age              |                  |                        |                    |
| 50-59            | 1.37 (0.75-2.49) | 1.11 (0.59-2.09)       | 7.05 (0.81-61.7)   |
| 60-69            | 1.05 (0.57-1.93) | 0.99 (0.53-1.87)       | 8.35 (0.98-70.8)   |
| ≥70              | 0.87 (0.52-1.45) | 0.85 (0.50-1.45)       | 27.03 (3.65-200.2) |
| Male             | 1.32 (0.89-1.96) | 1.54 (1.01-2.35)       | 1.40 (0.75-2.60)   |
| Race/ethnicity   |                  |                        |                    |
| Hispanic         | 1.64 (1.03-2.61) | 1.77 (1.09-2.88)       | 0.21 (0.08-0.55)   |
| African American | 1.41 (0.67-2.94) | 1.46 (0.68-3.17)       | 0.28 (0.07-1.23)   |
| Other            | 2.27 (0.79-6.53) | 1.73 (0.57-5.30)       | —                  |
| Unknown/missing  | 2.94 (1.56-5.53) | 2.60 (1.36-4.96)       | 0.43 (0.15-1.26)   |
| CAD or MI        | 0.70 (0.42-1.16) | 0.59 (0.34-1.03)       | 2.05 (1.07-3.92)   |
| CHF              | 1.09 (0.60-1.99) | 0.72 (0.36-1.41)       | 3.36 (1.64-6.89)   |
| Hypertension     | 0.98 (0.67-1.46) | 0.90 (0.60-1.36)       | 3.49 (1.69-7.18)   |
| COPD/Asthma      | 0.54 (0.33-0.88) | 0.45 (0.27-0.77)       | 1.10 (0.56-2.16)   |
| Cancer (active)  | 0.46 (0.15-1.40) | 0.42 (0.12-1.46)       | 1.94 (0.63-6.02)   |
| Liver disease    | 1.13 (0.60-2.13) | 1.09 (0.56-2.12)       | 0.79 (0.27-2.32)   |
| Renal disease    | 0.89 (0.54-1.47) | 0.93 (0.55-1.57)       | 2.56 (1.34-4.88)   |

Reference groups: “No disease” for diabetes and all comorbidities, normal weight for BMI category, age <50, female sex, Non-Hispanic White.

**Appendix 5.** Sensitivity analyses of 14-day outcomes among 450 people hospitalized with COVID-19.

|                  | Model 1<br><b>Mechanical<br/>Ventilation</b> | Model 2<br><b>Death or Mechanical<br/>Ventilation</b> | Model 3<br><b>Mechanical<br/>Ventilation</b> |
|------------------|----------------------------------------------|-------------------------------------------------------|----------------------------------------------|
| <i>N</i>         | 436                                          | 436                                                   | 407                                          |
| Characteristic   | OR (95% CI)                                  | OR (95% CI)                                           | OR (95% CI)                                  |
| Diabetes         | 1.86 (1.17-2.98)                             | 2.15 (1.38-3.34)                                      | 2.01 (1.24-3.25)                             |
| BMI Category     |                                              |                                                       |                                              |
| Overweight       | 1.43 (0.75-2.73)                             | 0.96 (0.54-1.70)                                      | 1.30 (0.68-2.51)                             |
| Obese            | 2.11 (1.12-3.95)                             | 1.52 (0.87-2.67)                                      | 2.01 (1.05-3.82)                             |
| Age              |                                              |                                                       |                                              |
| 50-59            | 0.96 (0.47-1.93)                             | 0.95 (0.48-1.90)                                      | 0.94 (0.47-1.90)                             |
| 60-69            | 1.11 (0.54-2.28)                             | 1.01 (0.50-2.04)                                      | 1.10 (0.53-2.28)                             |
| ≥70              | 1.52 (0.77-3.03)                             | 2.00 (1.03-3.89)                                      | 1.73 (0.86-3.48)                             |
| Male             | 1.61 (1.01-2.58)                             | 1.61 (1.04-2.50)                                      | 1.57 (0.97-2.52)                             |
| Race/ethnicity   |                                              |                                                       |                                              |
| Hispanic         | 1.93 (1.08-3.41)                             | 1.40 (0.81-2.42)                                      | 1.77 (0.99-3.17)                             |
| African American | 1.42 (0.62-3.26)                             | 0.98 (0.44-2.17)                                      | 1.25 (0.54-2.89)                             |
| Other            | 1.67 (0.52-5.41)                             | 1.07 (0.33-3.46)                                      | 1.44 (0.44-4.71)                             |
| Unknown/missing  | 2.34 (1.15-4.74)                             | 1.53 (0.77-3.06)                                      | 2.04 (1.00-4.16)                             |
| CAD or MI        | 0.53 (0.26-1.05)                             | 0.61 (0.33-1.12)                                      | 0.49 (0.24-1.00)                             |
| CHF              | 0.97 (0.41-2.25)                             | 1.40 (0.67-2.92)                                      | 1.15 (0.49-2.71)                             |
| COPD/Asthma      | 0.55 (0.31-0.98)                             | 0.58 (0.35-0.97)                                      | 0.52 (0.29-0.94)                             |
| Cancer (active)  | 0.54 (0.15-1.99)                             | 0.84 (0.30-2.36)                                      | 0.57 (0.15-2.21)                             |
| Liver disease    | 1.10 (0.54-2.25)                             | 0.91 (0.45-1.82)                                      | 1.04 (0.50-2.13)                             |
| Renal disease    | 1.05 (0.56-1.98)                             | 1.09 (0.61-1.93)                                      | 1.05 (0.56-1.99)                             |

Model 1: primary analysis; Model 2: composite outcome including mechanical ventilation or death; Model 3: analysis excluding people who died and were not mechanically ventilated. Reference groups: “No disease” for diabetes and all comorbidities, normal weight for BMI category, age <50, female sex, Non-Hispanic White.

**Appendix 6.** Additional BMI sub-categorization for 450 hospitalized people with COVID-19, according to diabetes status.

| Characteristic               | No Diabetes | Diabetes  |
|------------------------------|-------------|-----------|
| <i>N</i>                     | 272         | 178       |
| BMI Category, <i>n</i> (%)   |             |           |
| <18.5–24.9 kg/m <sup>2</sup> | 67 (24.6)   | 37 (20.8) |
| ≥25.0–29.9 kg/m <sup>2</sup> | 105 (38.6)  | 50 (28.1) |
| ≥30.0–34.9 kg/m <sup>2</sup> | 49 (18.0)   | 48 (27.0) |
| ≥35.0 kg/m <sup>2</sup>      | 51 (18.8)   | 43 (24.2) |

**Appendix 7.** Multivariable logistic regression analysis of 14-day outcomes among 450 hospitalized people with COVID-19 (additional BMI category).

| <i>N</i>                     | 14-day outcomes  |                        |                   |
|------------------------------|------------------|------------------------|-------------------|
|                              | ICU Admission    | Mechanical Ventilation | Death             |
|                              | 436              | 436                    | 417               |
| Characteristic               | OR (95% CI)      | OR (95% CI)            | OR (95% CI)       |
| Diabetes                     | 1.59 (1.00-2.51) | 1.96 (1.20-3.18)       | 2.02 (1.01-4.04)  |
| BMI Category                 |                  |                        |                   |
| ≥25.0–29.9 kg/m <sup>2</sup> | 1.42 (0.78-2.58) | 1.43 (0.75-2.72)       | 0.61 (0.26-1.47)  |
| ≥30.0–34.9 kg/m <sup>2</sup> | 2.20 (1.14-4.27) | 2.32 (1.15-4.68)       | 1.11 (0.43-2.86)  |
| ≥35.0 kg/m <sup>2</sup>      | 2.11 (1.09-4.09) | 1.95 (0.96-3.98)       | 1.10 (0.42-2.86)  |
| Age                          |                  |                        |                   |
| 50-59                        | 1.13 (0.57-2.24) | 1.02 (0.50-2.08)       | 3.74 (0.40-34.5)  |
| 60-69                        | 1.22 (0.60-2.49) | 1.20 (0.57-2.53)       | 4.57 (0.50-41.9)  |
| ≥70                          | 1.41 (0.69-2.85) | 1.72 (0.82-3.61)       | 12.6 (1.50-106.5) |
| Male                         | 1.36 (0.88-2.12) | 1.60 (1.00-2.57)       | 1.35 (0.66-2.75)  |
| Race/ethnicity               |                  |                        |                   |
| Hispanic                     | 1.60 (0.93-2.76) | 1.94 (1.09-3.44)       | 0.44 (0.15-1.25)  |
| African American             | 1.36 (0.62-2.97) | 1.48 (0.64-3.42)       | 0.35 (0.07-1.62)  |
| Other                        | 2.30 (0.76-6.98) | 1.72 (0.53-5.59)       | —                 |
| Unknown/missing              | 2.75 (1.38-5.47) | 2.35 (1.15-4.77)       | 0.68 (0.21-2.18)  |
| CAD or MI                    | 0.62 (0.33-1.19) | 0.55 (0.27-1.10)       | 0.71 (0.31-1.61)  |
| CHF                          | 1.66 (0.78-3.54) | 1.00 (0.43-2.33)       | 1.91 (0.76-4.82)  |
| Hypertension                 | 0.96 (0.57-1.60) | 0.78 (0.45-1.35)       | 1.33 (0.57-3.11)  |
| COPD/Asthma                  | 0.66 (0.39-1.11) | 0.55 (0.31-0.97)       | 0.75 (0.35-1.60)  |
| Cancer (active)              | 0.60 (0.18-1.94) | 0.56 (0.15-2.06)       | 1.57 (0.46-5.36)  |
| Liver disease                | 1.13 (0.57-2.23) | 1.10 (0.54-2.25)       | 0.91 (0.27-3.03)  |
| Renal disease                | 0.89 (0.49-1.64) | 1.11 (0.58-2.10)       | 1.22 (0.55-2.73)  |

Reference groups: “No disease” for diabetes and all comorbidities, underweight/normal weight for BMI category, age <50, female sex, Non-Hispanic White. Events per outcome: 156 people were admitted to the ICU, 129 people were mechanically ventilated, 49 people died within 14 days of presentation to care.

**Appendix 8.** Table of missing variables.

| Variable                       | Missing number |
|--------------------------------|----------------|
| Age                            | 1              |
| Sex                            | 0              |
| Race/ethnicity                 | 49             |
| Diabetes status                | 0              |
| BMI                            | 0              |
| ICU outcome                    | 2              |
| Mechanical Ventilation outcome | 2              |
| Death outcome                  | 9              |
| CAD or MI                      | 0              |
| Hypertension                   | 0              |
| COPD/Asthma                    | 0              |
| CHF                            | 0              |
| Liver disease                  | 7              |
| Renal disease                  | 4              |
| Cancer (active)                | 6              |
